# Supplementary material for: Patterns of Subnet Usage Reveal Distinct Scales of Regulation in the Transcriptional Regulatory Network of Escherichia coli
Source: PLOS journal article supplement (doi:10.1371/journal.pcbi.1000836), 2010-07-01
Supplement: S1 (10.1371/journal.pcbi.1000836.s001) [file journal.pcbi.1000836.s001]

# Patterns of subnet usage reveal distinct scales of regulation in the transcriptional regulatory network of *Escherichia coli*

Carsten Marr<sup>1,\*</sup>, Fabian J. Theis<sup>1,2</sup>, Larry S. Liebovitch<sup>3</sup>, Marc-Thorsten Hütt<sup>4</sup>

**1** Institute for Bioinformatics and Systems Biology, Helmholtz Zentrum München - German Research Center for Environmental Health, Neuherberg, Germany

**2** Institute for Mathematical Sciences, Technische Universität München, Garching, Germany

**3** Center for Complex Systems and Brain Sciences, Florida Atlantic University, Boca Raton, Florida, USA

**4** Computational Systems Biology, School of Engineering and Science, Jacobs University Bremen, Bremen, Germany

\* E-mail: carsten.marr@helmholtz-muenchen.de

**Text S1: Supplementary figures**

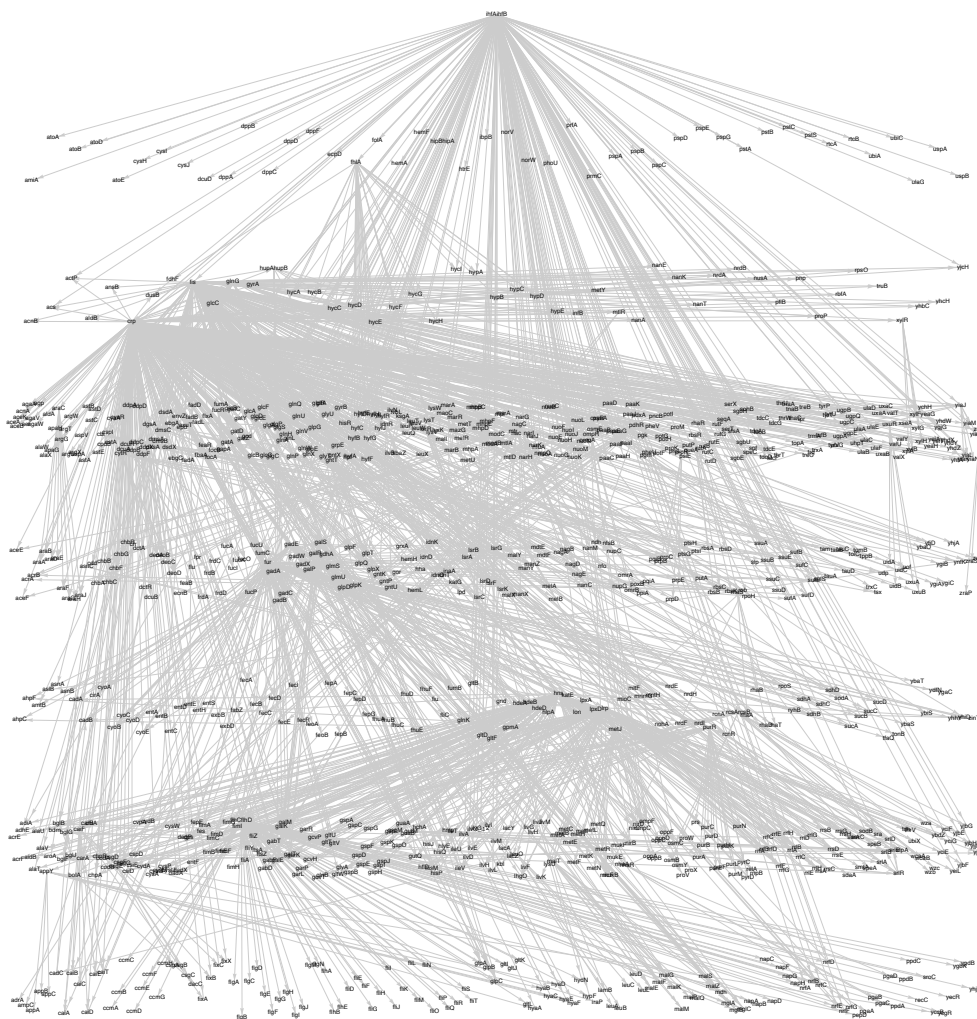

Figure 1. A highly resolved version of the *ihfAihfB* subnet.

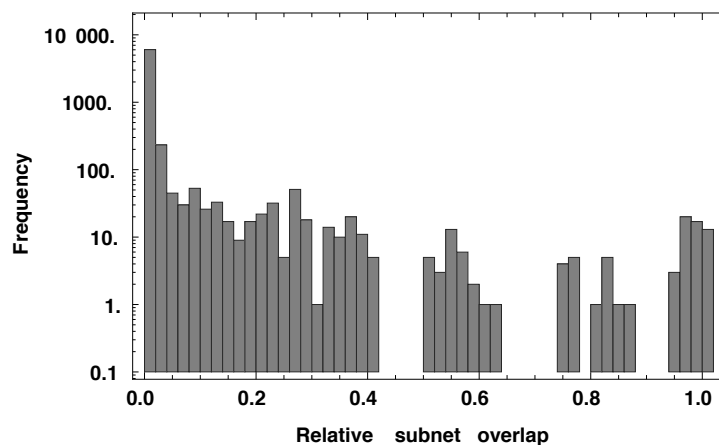

**Figure 2. Histogram of the relative overlap of all pairs of subnets.** We plot the frequency distribution of the relative overlap (Intersection/Maximum) calculated for all  $117 \times 116/2$  pairs of subnets. Interestingly, apart from a peak at 0, the subnet overlap is a fairly equally distributed quantity.

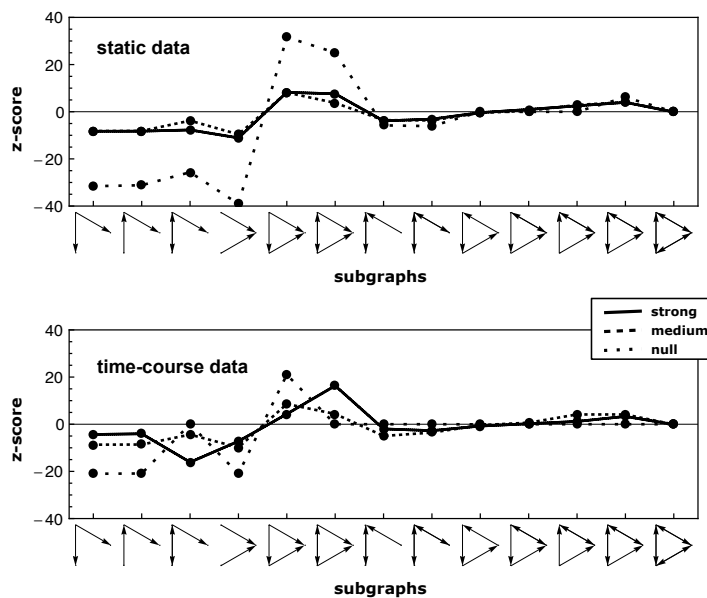

**Figure 3. z-score profiles of all 13 possible directed triads.** For the two expression data sets (top: static data, bottom: time-course data) we calculate the z-score profiles for all identified clusters of different subnet usage. In both data sets, we find the feed-forward loop (5th triad) to be overrepresented in the ‘null’ cluster, in contrast to other cluster.

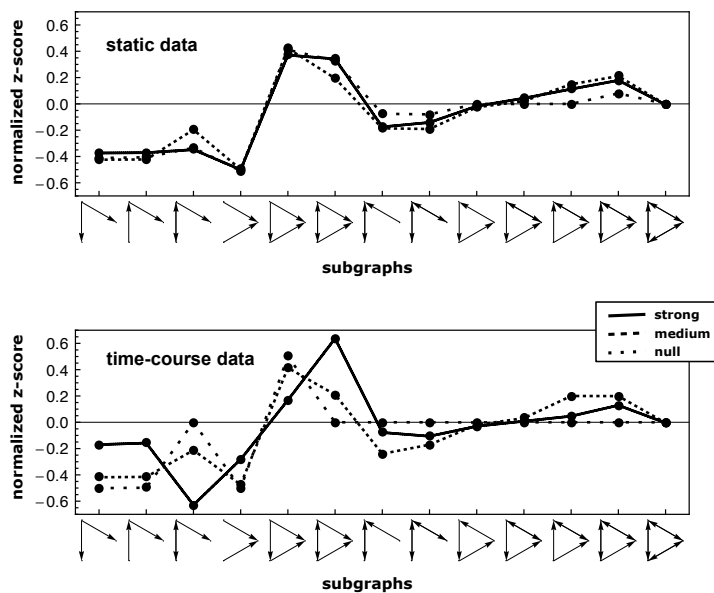

**Figure 4. Normalized z-score profiles of all 13 possible directed triads.** For the two expression data sets (top: static data, bottom: time-course data) we calculate the normalized z-score profiles for all identified clusters of different subnet usage. The networks of all cluster show the triad significance profile of bacterial regulatory networks (compare with [12]).

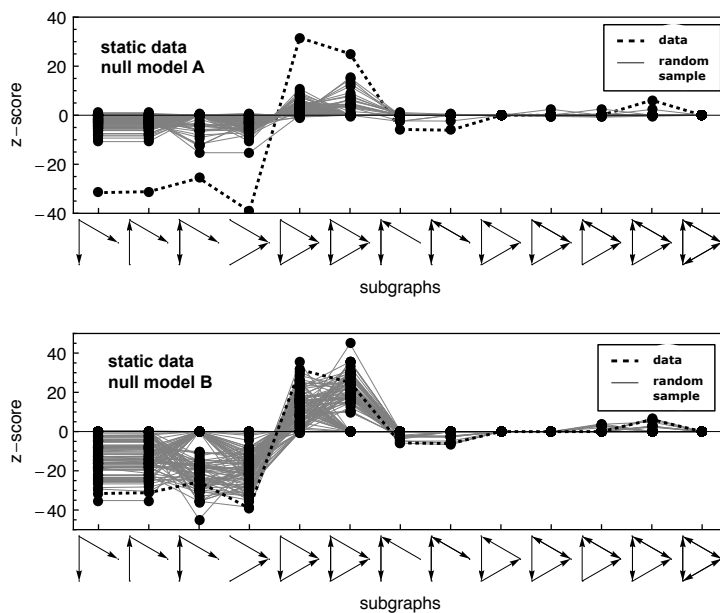

**Figure 5. Comparison with null model z-score profiles.** For both null models (see main text for details) we find that the feed-forward loop z-score of the 'null' cluster exceeds both null model averages.

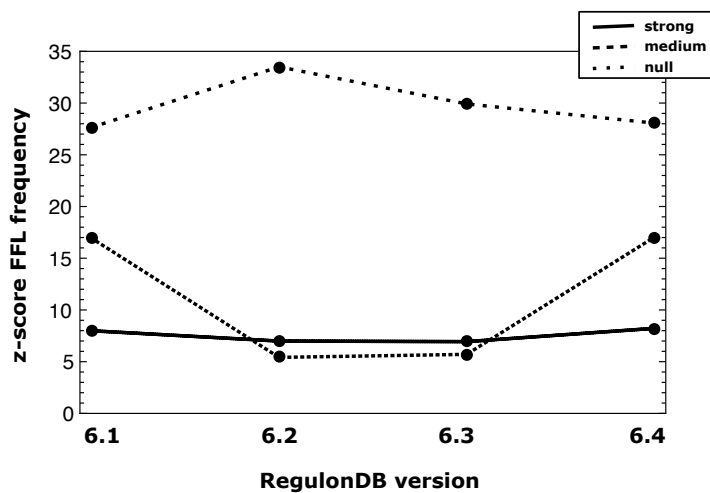

**Figure 6. FFL enrichment in the time-course data, using the last four version of RegulonDB (6.1 - 6.4).** We find that irrespective of the RegulonDB version used in our analysis, a prominent FFL enrichment in the ‘null’ cluster appears.

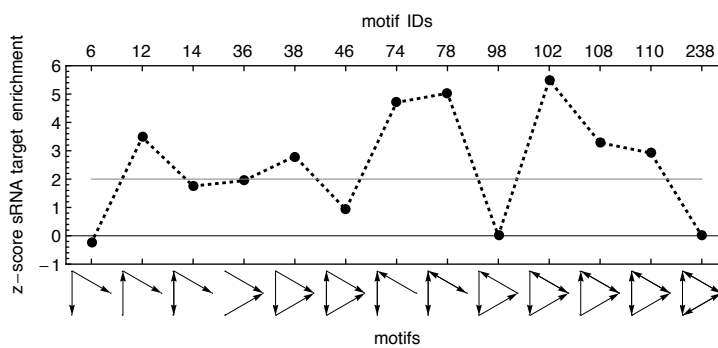

**Figure 7. sRNA mediated control on network motifs.** Comparing the number of 3-node motifs with at least one sRNA target with randomly sampled sets of targets of the same size, we identify seven motifs with significantly ( $z - \text{score} \geq 2$ ) enriched occurrence of sRNA targets.
